# Supplementary material
Source: PubMed Central journal article supplement (PMC2040437)

**A**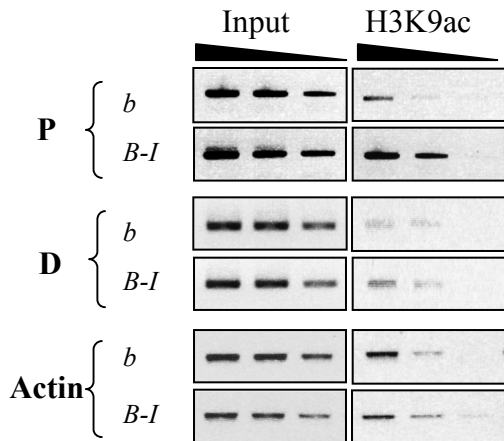**B**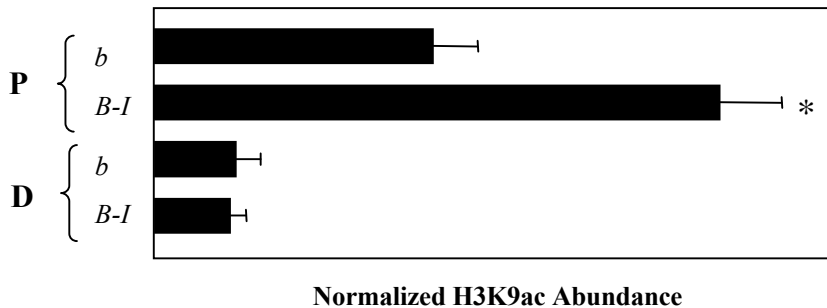

Supplement: pnas_0705629104_2.pdf [file pnas_0705629104_2.pdf]
